# Supplementary material for: Two-year outcomes after arthroscopic surgery compared to physical therapy for femoracetabular impingement: A protocol for a randomized clinical trial
Source: Springer Nature journal article supplement (doi:10.1186/s12891-016-0914-1), 2016-02-04
Supplement: MOESM1 [file 9753040]

# Hip Arthroscopy for FAI (Femoroplasty and Acetabuloplasty) Rehabilitation

Madigan Army Medical Center - Physical Therapy

|                    | 0 to 7 days Post-op                                                                                                                                                                                                                                                                                                                                                                                                                                                                                                                                                                                                                                                                                                                                                        | 8 days to 21 days Post-op                                                                                                                                                                                                                                                                                                                                                                                                                                                                                                                                                                                                                                                                                                                    | 22 days to 48 days Post-op                                                                                                                                                                                                                                                                                                                                                                                                                                                                                                                                                                                                                                                                                                                                                                                                         | 49 days Post-op                                                                                                                                                                                                                                                                                                                                                                                                                                                                                                                                                                                                                                                                                                                                                                                                                                                                                                                                                                                                                                |
|--------------------|----------------------------------------------------------------------------------------------------------------------------------------------------------------------------------------------------------------------------------------------------------------------------------------------------------------------------------------------------------------------------------------------------------------------------------------------------------------------------------------------------------------------------------------------------------------------------------------------------------------------------------------------------------------------------------------------------------------------------------------------------------------------------|----------------------------------------------------------------------------------------------------------------------------------------------------------------------------------------------------------------------------------------------------------------------------------------------------------------------------------------------------------------------------------------------------------------------------------------------------------------------------------------------------------------------------------------------------------------------------------------------------------------------------------------------------------------------------------------------------------------------------------------------|------------------------------------------------------------------------------------------------------------------------------------------------------------------------------------------------------------------------------------------------------------------------------------------------------------------------------------------------------------------------------------------------------------------------------------------------------------------------------------------------------------------------------------------------------------------------------------------------------------------------------------------------------------------------------------------------------------------------------------------------------------------------------------------------------------------------------------|------------------------------------------------------------------------------------------------------------------------------------------------------------------------------------------------------------------------------------------------------------------------------------------------------------------------------------------------------------------------------------------------------------------------------------------------------------------------------------------------------------------------------------------------------------------------------------------------------------------------------------------------------------------------------------------------------------------------------------------------------------------------------------------------------------------------------------------------------------------------------------------------------------------------------------------------------------------------------------------------------------------------------------------------|
| <b>Document</b>    | NV status, pain, level, swelling, ecchymosis, gait status                                                                                                                                                                                                                                                                                                                                                                                                                                                                                                                                                                                                                                                                                                                  | NV status, pain level, swelling, ecchymosis, gait status, ROM, strength                                                                                                                                                                                                                                                                                                                                                                                                                                                                                                                                                                                                                                                                      | Pain level, swelling, gait, ROM & strength, current exercise program                                                                                                                                                                                                                                                                                                                                                                                                                                                                                                                                                                                                                                                                                                                                                               | Functional level, ROM & strength, current exercise program                                                                                                                                                                                                                                                                                                                                                                                                                                                                                                                                                                                                                                                                                                                                                                                                                                                                                                                                                                                     |
| <b>Follow up</b>   | Ortho 10-14 days post op for wound check and suture removal                                                                                                                                                                                                                                                                                                                                                                                                                                                                                                                                                                                                                                                                                                                | Ortho 6 weeks post-op<br>Every 3-4 weeks with PT, attend PT 2-3x/wk                                                                                                                                                                                                                                                                                                                                                                                                                                                                                                                                                                                                                                                                          | Ortho 12 weeks<br>Every 3-4 wks with PT, attend PT 2-3x/wk                                                                                                                                                                                                                                                                                                                                                                                                                                                                                                                                                                                                                                                                                                                                                                         | Every 2-3 weeks with PT. Perform exercises 3-5x/wk. F/u w/ ortho PRN.                                                                                                                                                                                                                                                                                                                                                                                                                                                                                                                                                                                                                                                                                                                                                                                                                                                                                                                                                                          |
| <b>Crutches</b>    | WBAT x 3 weeks (MUST use crutches for stability)                                                                                                                                                                                                                                                                                                                                                                                                                                                                                                                                                                                                                                                                                                                           | WBAT x 3 weeks (MUST use crutches for stability)                                                                                                                                                                                                                                                                                                                                                                                                                                                                                                                                                                                                                                                                                             | FWB                                                                                                                                                                                                                                                                                                                                                                                                                                                                                                                                                                                                                                                                                                                                                                                                                                | FWB                                                                                                                                                                                                                                                                                                                                                                                                                                                                                                                                                                                                                                                                                                                                                                                                                                                                                                                                                                                                                                            |
| <b>Precautions</b> | -NOTE: Do not push through hip flexor pain                                                                                                                                                                                                                                                                                                                                                                                                                                                                                                                                                                                                                                                                                                                                 | -NO BALLISTIC/FORCED STRETCHING                                                                                                                                                                                                                                                                                                                                                                                                                                                                                                                                                                                                                                                                                                              | NO BALLISTIC/FORCED STRETCHING, NO TREADMILL, NO CONTACT ACTIVITIES                                                                                                                                                                                                                                                                                                                                                                                                                                                                                                                                                                                                                                                                                                                                                                | None                                                                                                                                                                                                                                                                                                                                                                                                                                                                                                                                                                                                                                                                                                                                                                                                                                                                                                                                                                                                                                           |
| <b>Wound</b>       | -Check for Erythema/ Abnormal Temperature/ Excessive Effusion/ Drainage.                                                                                                                                                                                                                                                                                                                                                                                                                                                                                                                                                                                                                                                                                                   | -Begin scar massage when incision site re-epithelializes                                                                                                                                                                                                                                                                                                                                                                                                                                                                                                                                                                                                                                                                                     | -Continue scar massage                                                                                                                                                                                                                                                                                                                                                                                                                                                                                                                                                                                                                                                                                                                                                                                                             | n/a                                                                                                                                                                                                                                                                                                                                                                                                                                                                                                                                                                                                                                                                                                                                                                                                                                                                                                                                                                                                                                            |
| <b>Exercises</b>   | <ul style="list-style-type: none"> <li>- Stationary bike w/ minimal resistance</li> <li>- Seated piriformis stretch</li> <li>- Glut/quad/HS/TRA isometrics</li> </ul> <b>-PROM Series:</b><br><b>(Continue Until DAY 22 Post-op)</b><br><b>SUPINE:</b> <ol style="list-style-type: none"> <li>1. Circumduction (CW/CCW)</li> <li>2. Non-affected SLR (affected leg straight)</li> <li>3. Affected SLR (Non-affected leg straight)</li> <li>4. Circumduction knee bent (CW/CCW)</li> <li>5. Hip flex (opposite leg bent)</li> <li>6. FABER (let fall out, assist up)</li> <li>7. Long axis abduction</li> <li>8. Passive supine roll (long leg IR/ER)</li> </ol> <b>PRONE:</b> <ol style="list-style-type: none"> <li>1. IR</li> <li>2. ER</li> <li>3. Knee flex</li> </ol> | <ul style="list-style-type: none"> <li>- Double leg hip rotations</li> <li>- Quadruped rocking</li> <li>- Standing hip IR on stool</li> <li>- Heel slides</li> <li>- Hip abd/add isometrics</li> <li>- Uninvolved knee to chest</li> <li>- IR/ER (gentle to moderate resistance)</li> </ul> <b>***Begin Standing AROM when patient can demonstrate symmetrical WB w/out assistive device:</b> <ul style="list-style-type: none"> <li>- Double leg Romanian Dead Lift</li> <li>- Double leg pelvic circles</li> <li>- Lateral weight shift with overhead reach</li> </ul> <b>Begin post-op Day 15:</b> <ul style="list-style-type: none"> <li>- Clam Shell</li> <li>- Hip 3-way: abd/add/quadruped ext</li> <li>- Bridge w/ tubing</li> </ul> | <b>Continue previous exercises and ADD:</b> <ul style="list-style-type: none"> <li>- Kneeling hip flexor stretch</li> <li>- Leg press (low weight)</li> </ul> <b>Begin post-op Day 29:</b> <ul style="list-style-type: none"> <li>- Standing Figure 4 stretch</li> <li>- Prone FABER position self-mobs</li> <li>- Dyna-disc Single leg</li> <li>- Side plank</li> <li>- Standing hip IR (stool)</li> </ul> <b>Begin Post-op Day 36:</b> <ul style="list-style-type: none"> <li>- Manual long axis distraction</li> <li>- Bridge: single leg</li> </ul> <b>Begin Post-op Day 42:</b> <ul style="list-style-type: none"> <li>- Elliptical</li> <li>- Single leg trunk rotation with band</li> <li>- Side stepping</li> <li>- Slide board, side to side with push-off at ends</li> <li>-Lateral step-down with heel hover</li> </ul> | <ul style="list-style-type: none"> <li>- Lunges</li> <li>- Hurdles (slow speed)</li> <li>- Carioca (slow speed with external ROT at 90 degrees hip flexion)</li> <li>- Agility Ladder: Forward double leg hop (land in mini-squat), Lateral hops (both directions) Lateral shuffle (both directions):</li> <li>-Plank to pushup start position</li> <li>- Side stepping w/band</li> <li>- Lateral step-downs w/ heel hover</li> <li>- Isolateral Romanian Deadlift: partial range holding dowel along spine</li> </ul> <b>Begin Post-op Day 55:</b> <ul style="list-style-type: none"> <li>-Multi-directional lunges</li> <li>-Hurdles (medium to fast speed)</li> <li>-Carioca (medium to fast speed with external ROT at 90 degrees hip flexion)</li> <li>-Agility ladder: Single leg hops, Double leg hop 2 squares forward and 1 square backward</li> <li>-Isolateral Romanian Deadlift (start and end position with contralateral LE in 90 deg hip flexion)</li> <li>-Return to run progress as early as <b>Post-op Day 63</b></li> </ul> |
| <b>Modality</b>    | -Game ready/ice and elevation                                                                                                                                                                                                                                                                                                                                                                                                                                                                                                                                                                                                                                                                                                                                              | -Game ready/ice and elevation                                                                                                                                                                                                                                                                                                                                                                                                                                                                                                                                                                                                                                                                                                                | -PRN for chronic swelling/scar formation                                                                                                                                                                                                                                                                                                                                                                                                                                                                                                                                                                                                                                                                                                                                                                                           | -Ice PRN                                                                                                                                                                                                                                                                                                                                                                                                                                                                                                                                                                                                                                                                                                                                                                                                                                                                                                                                                                                                                                       |
| <b>Goals</b>       | <ol style="list-style-type: none"> <li>1) Protect healing tissue</li> <li>2) Restore ROM</li> <li>3) Diminish pain/inflammation</li> <li>4) Prevent muscular inhibition %</li> </ol>                                                                                                                                                                                                                                                                                                                                                                                                                                                                                                                                                                                       | <ol style="list-style-type: none"> <li>1) Protect repaired tissue</li> <li>2) Restore ROM/ normal gait pattern</li> <li>4) Progressive increase in strength</li> </ol>                                                                                                                                                                                                                                                                                                                                                                                                                                                                                                                                                                       | <ol style="list-style-type: none"> <li>1) Restore muscle endurance and strength</li> <li>2) Restore cardiovascular fitness</li> <li>3) Restore balance/proprioception</li> </ol>                                                                                                                                                                                                                                                                                                                                                                                                                                                                                                                                                                                                                                                   | Return to full duty when: <ol style="list-style-type: none"> <li>1) Full ROM</li> <li>2) Hip strength &gt; 85% uninvolved side</li> <li>3) Perform sport/job specific drills at full speed without pain</li> </ol>                                                                                                                                                                                                                                                                                                                                                                                                                                                                                                                                                                                                                                                                                                                                                                                                                             |
