# Supplementary material for: Two-year outcomes after arthroscopic surgery compared to physical therapy for femoracetabular impingement: A protocol for a randomized clinical trial
Source: Springer Nature journal article supplement (doi:10.1186/s12891-016-0914-1), 2016-02-04
Supplement: MOESM2 [file 9753040]

# Supplemental File A: Clinical Reasoning Framework

| Positive with Test or Movement<br><i>(Positive = Pain reproduced or asymmetry with opposite side)</i> | Paired Treatment Approach for Manual Techniques |
|-------------------------------------------------------------------------------------------------------|-------------------------------------------------|
|-------------------------------------------------------------------------------------------------------|-------------------------------------------------|

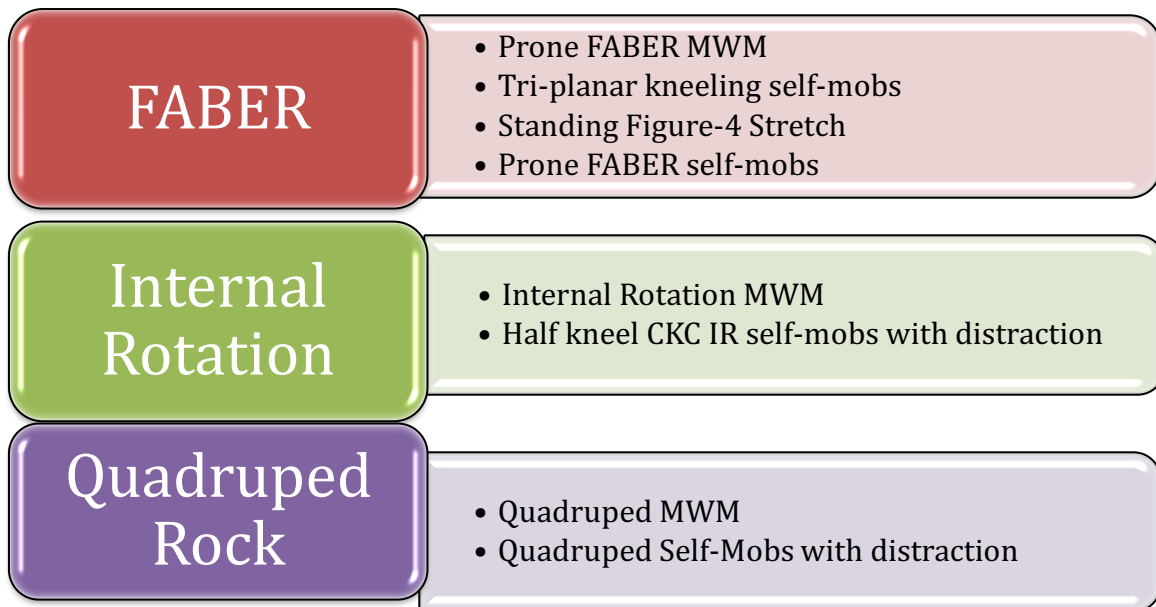

MWM = Movement with Mobilization  
FABER = Flexion Abduction External Rotation
