# Supplementary material for: Two-year outcomes after arthroscopic surgery compared to physical therapy for femoracetabular impingement: A protocol for a randomized clinical trial
Source: Springer Nature journal article supplement (doi:10.1186/s12891-016-0914-1), 2016-02-04
Supplement: MOESM3 [file 9753040]

## SUPPLEMENTAL FILE D: Manual Therapy Mobilization Techniques

Note: All subjects have provided their consent to appear in the figures.

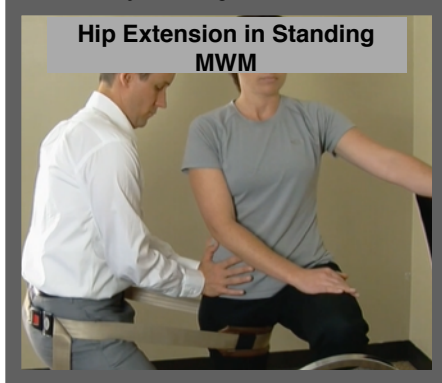

**Clinician Position:**  
Standing next to the patient, on the side of the hip to be treated. Hands over ilium

**Technique Description:**  
Apply a lateral glide as the patient leans forward into extension.

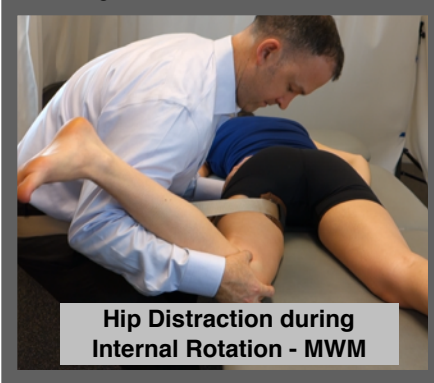

**Clinician Position:**  
Standing next to patient, one hand on lateral hip and the other on distal thigh

**Technique Description:**  
Apply a lateral glide as the patient's hip moves into internal rotation (passive and active)

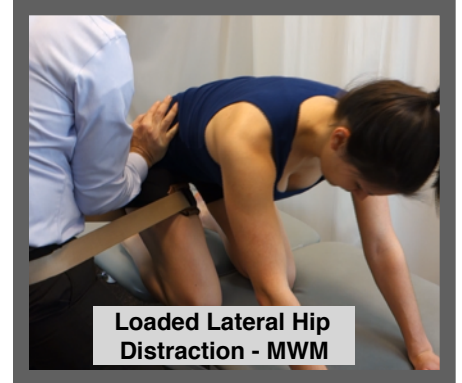

**Clinician Position:**  
Standing at side of involved hip

**Technique Description:**  
Have patient rock forward and back (into loaded hip flexion) while a lateral glide force is imparted

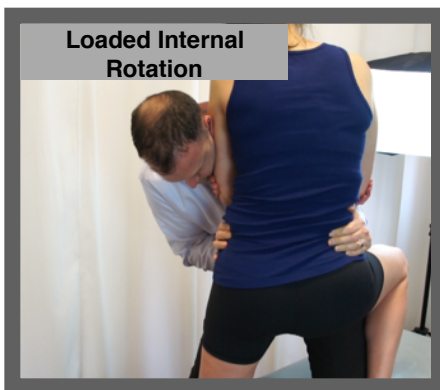

**Clinician Position:**  
Stand facing the patient, Place a hand over each iliac crest of the patient. Use your thigh to block and stabilize the leg.

**Technique Description:**  
Patient's knee on the side to be mobilized down and opposite hip up to put their foot flat on the table. Gently rotate the pelvis in towards you to provide a loaded internal rotation force to the left hip

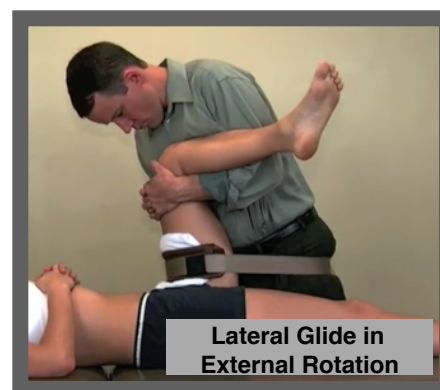

**Clinician Position:**  
Standing facing patient's involved hip

**Technique Description:**  
Maintaining the thigh perpendicular to the table, introduce hip external rotation until pain and/or resistance is perceived. Apply a distraction force by moving your hips/buttocks posteriorly. After mobilizing for 10-20 seconds, move the hip into further external rotation to engage the new restrictive barrier and repeat process.

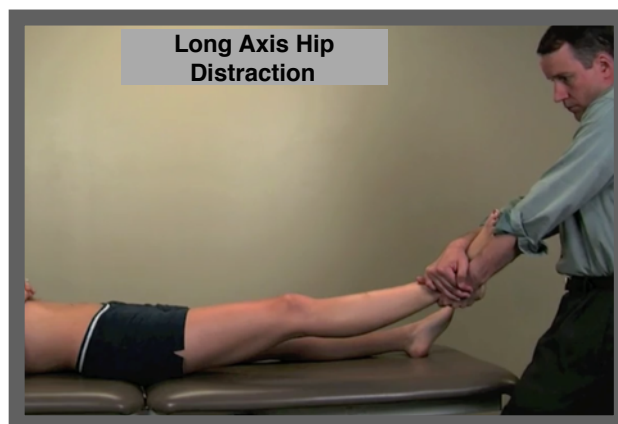

**Clinician Position:**  
Standing at foot of patient, both hands around the ankle with elbows locked.

**Technique Description:**  
Grasp the patient's ankle with both hands just above the malleoli. Position the hip in slight flexion and abduction  
Apply a distraction force to the hip by shifting your weight to your back foot and pulling with both arm. The technique may be performed as a graded mobilization into resistance or as a high-velocity thrust at end range. Progress the technique by positioning the hip in further abduction and internal rotation prior to performing the mobilization or thrust manipulation
